# Supplementary material for: miR-196B-5P and miR-200B-3P Are Differentially Expressed in Medulloblastomas of Adults and Children
Source: MDPI journal article supplement (doi:10.3390/diagnostics10050265), 2020-04-29
Supplement: s1 [file s1]

**Table S2.** *CTNNB1* mutations founded in Adult and Childhood Medulloblastoma.

| Case  | <i>CTNNB1</i> Mutations |
|-------|-------------------------|
| AD-4  | p.D32Y (c.94G>T)        |
| AD-8  | p.G34R (c.100G>A)       |
| AD-10 | p.D32E (c.96C>A)        |
|       | p.V61F (c.181G>T)       |
| AD-14 | p.D32Y (c.94G>T)        |
| CH-12 | p.A13V (c.38A>G)        |
| CH-15 | p.S47N (c.140G>A)       |
| CH-16 | p.A20T (c.58G>A)        |
| CH-20 | p.D81N (c.241G>A)       |
